# Supplementary material
Source: publisher site journal article supplement (https://www.dovepress.com/article/263980)
Supplement: Supplementary file 1 [file get_supplementary_file.php]

**Table S1. Association between clinicopathologic characteristics and CXCL13 expression in PC cohort (n=40)**

| **Clinicopathological**  **Parameters** | **CXCL13 low expression** | | **CXCL13 High expression** | **Odds Ratio** | **P value** |
| --- | --- | --- | --- | --- | --- |
| **Age (year)** |  | |  | 2.333 | 0.333 |
| <50 | 14(58.3%) | | 6(37.5%) |  |  |
| ≥50 | 10(41.7%) | | 10(62.5%) |  |  |
| **Phimosis** |  | |  | 1.727 | 0.482 |
| Yes | 19(75.4%) | | 11(75.0%) |  |  |
| No | 5(24.6%) | | 5(25.0%) |  |  |
| **Body mass index** |  | |  | 2.600 | 0.203 |
| <24 | 13(54.2%) | | 5(31.3%) |  |  |
| ≥24 | 11(45.8%) | | 11(68.7%) |  |  |
| **Pathological grade** |  | |  | 2.571 | 0.199 |
| G1 | 16(66.7%) | | 7(43.8%) |  |  |
| G2+G3 | 8(33.3%) | | 9(56.2%) |  |  |
| **Histological subtype** | |  |  | 0.490 | 1.800 |
| Usual | 18(75.0%) | | 10(62.5%) |  |  |
| Others | 6(25.0%) | | 6(37.5%) |  |  |
| **T stage** |  | |  | 5.000 | 0.025 |
| T1 | 18(61.5%) | | 6(37.5%) |  |  |
| T2+T3 | 6(38.5%) | | 10(62.5%) |  |  |
| **Nodal status** |  | |  | 5.250 | 0.034 |
| Negative | 21(87.5%) | | 8(50.0%) |  |  |
| Positive | 4(12.5%) | | 8(50.0%) |  |  |
| **Pelvic LNM** |  | |  | 1.571 | 1.000 |
| No | 22(91.7%) | | 14(87.5%) |  |  |
| Yes | 2(8.3%) | | 2(12.5%) |  |  |
